# Supplementary material for: Distinct Phyllosphere Bacterial Communities on Arabidopsis Wax Mutant Leaves
Source: PubMed Central journal article supplement (PMC3818481; doi:10.1371/journal.pone.0078613), 2013-11-05

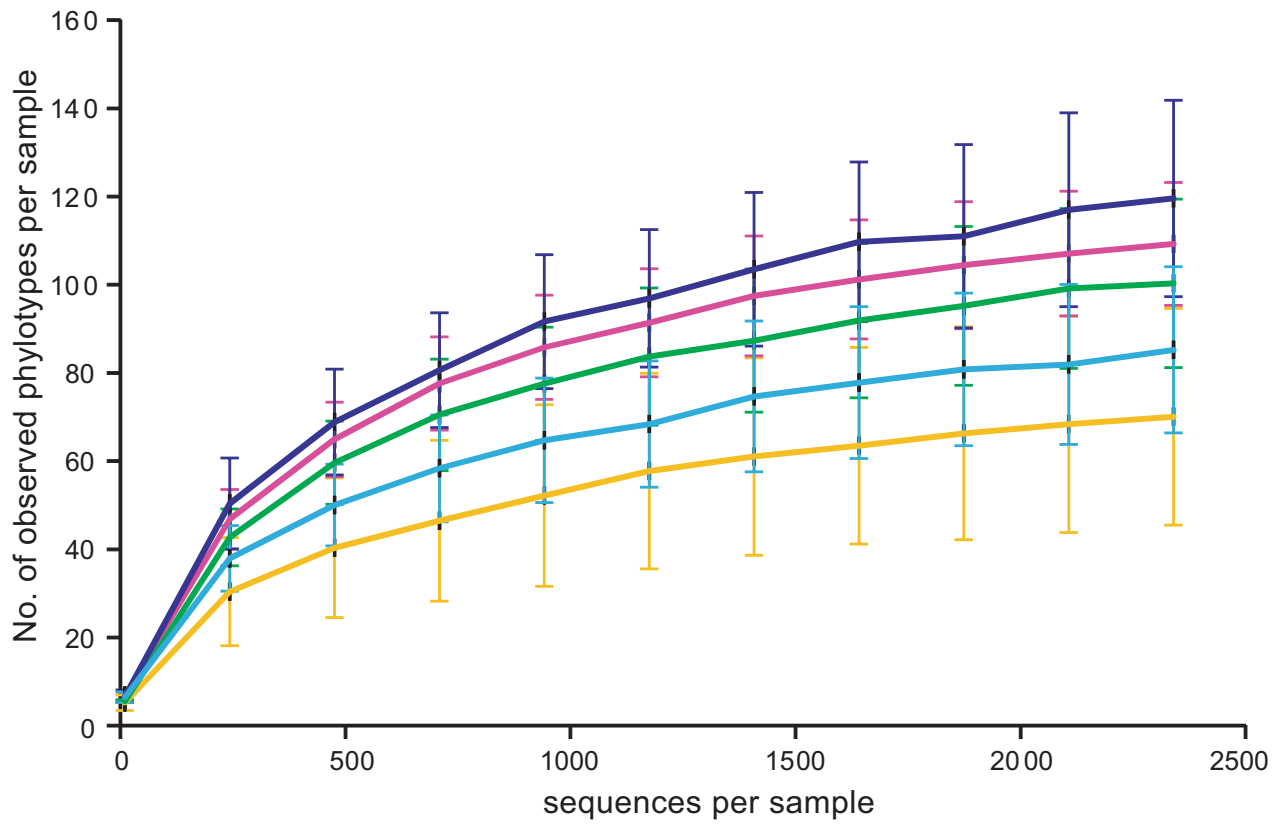

Supplement: pone.0078613.s003.pdf [file pone.0078613.s003.pdf]
